# Supplementary material for: Natural Products Biosynthesis by Streptomyces netropsis IMV Ac-5025 under Exogenous Sterol Action
Source: MDPI journal article supplement (doi:10.3390/antibiotics13020146), 2024-02-01
Supplement: s1 [file s1]

## Supplementary materials

### Natural products biosynthesis by *Streptomyces netropsis* IMV Ac-5025 under exogenous sterol action

Mariia Loboda <sup>1</sup>, Liudmyla Biliavska <sup>1</sup>, Halyna Iutynska <sup>1</sup>, Jake Newitt <sup>2</sup> and Ruslan Mariychuk <sup>3,\*</sup>

<sup>1</sup> Department of General and Soil Microbiology, D.K. Zabolotny Institute of Microbiology and Virology, National Academy of Sciences of Ukraine, Akademika Zabolotnoho str., 154, Kyiv, Ukraine; marichka20loboda@gmail.com (M.L.), bilyuvskal@ukr.net (L.B.), galyna.iutynska@gmail.com (H.I.)

<sup>2</sup> Department of Molecular Microbiology, John Innes Centre, Norwich NR4 7UH, United Kingdom; jake.newitt@jic.ac.uk

<sup>3</sup> University of Presov, Presov, Slovakia; ruslan.mariychuk@unipo.sk

\* Correspondence: ruslan.mariychuk@unipo.sk

**Table S1.** Polyene antibiotics' accumulation by *S. netropsis* IMV Ac-5025 grown in synthetic and organic nutrient media in culture liquid supplemented with exogenous  $\beta$ -sitosterol (ADB – absolutely dry biomass).

**Table S2.** Biosynthesis of squalene and sterols in *S. netropsis* IMV Ac-5025 biomass grown in synthetic nutrient medium supplemented with exogenous  $\beta$ -sitosterol.

**Table S3.** Biosynthesis of auxins in *S. netropsis* IMV Ac-5025 biomass grown in synthetic nutrient medium supplemented with exogenous  $\beta$ -sitosterol.

**Table S4.** Cytokinins' biosynthesis in *S. netropsis* IMV Ac-5025 biomass grown in synthetic nutrient medium supplemented with exogenous  $\beta$ -sitosterol.

**Table S1.** Polyene antibiotics' accumulation by *S. netropsis* IMV Ac-5025 grown in synthetic and organic nutrient media in culture liquid supplemented with exogenous  $\beta$ -sitosterol (ADB – absolutely dry biomass).

| Syntetic nutrient medium              |                            |                             |                                      |                  |                    |                     |                              |
|---------------------------------------|----------------------------|-----------------------------|--------------------------------------|------------------|--------------------|---------------------|------------------------------|
| $\beta$ -Sitosterol, $\mu\text{g/mL}$ | Culture liquid             |                             |                                      | Biomass, g/L     | Biomass extract    |                     |                              |
|                                       | Tetraene, $\mu\text{g/mL}$ | Candidine, $\mu\text{g/mL}$ | Sum of antibiotics, $\mu\text{g/mL}$ |                  | Tetraene, mg/g ADB | Candidine, mg/g ADB | Sum of antibiotics, mg/g ADB |
| 0                                     | 2.68 $\pm$ 0.09            | 0.32 $\pm$ 0.07             | 3 $\pm$ 0.16                         | 2.65 $\pm$ 0.2   | 1.399 $\pm$ 0.11   | 0.53 $\pm$ 0.01     | 1.929 $\pm$ 0.1              |
| 0.1                                   | 7.3 $\pm$ 0.41             | 0.5 $\pm$ 0.06              | 7.8 $\pm$ 0.46                       | 3.7 $\pm$ 0.23   | 1.543 $\pm$ 0.04   | 0.772 $\pm$ 0.01    | 2.315 $\pm$ 0.04             |
| 0.25                                  | 7.12 $\pm$ 0.1             | 3.1 $\pm$ 0.41              | 10.22 $\pm$ 0.36                     | 3.29 $\pm$ 0.23  | 1.556 $\pm$ 0.13   | 0.809 $\pm$ 0.03    | 2.365 $\pm$ 0.11             |
| 2.5                                   | 7.5 $\pm$ 0.06             | 3.05 $\pm$ 0.16             | 10.55 $\pm$ 0.12                     | 4.44 $\pm$ 0.24  | 2.405 $\pm$ 0.23   | 0.907 $\pm$ 0.11    | 3.312 $\pm$ 0.3              |
| 5                                     | 7.66 $\pm$ 0.25            | 3.9 $\pm$ 0.57              | 11.56 $\pm$ 0.32                     | 5.2 $\pm$ 0.2    | 2.442 $\pm$ 0.26   | 1.326 $\pm$ 0.02    | 3.768 $\pm$ 0.29             |
| 10                                    | 8.4 $\pm$ 0.41             | 4.98 $\pm$ 0.07             | 13.38 $\pm$ 0.47                     | 4.56 $\pm$ 0.2   | 3.218 $\pm$ 0.12   | 1.699 $\pm$ 0.1     | 4.919 $\pm$ 0.22             |
| Organic nutrient medium               |                            |                             |                                      |                  |                    |                     |                              |
| $\beta$ -Sitosterol, $\mu\text{g/mL}$ | Culture liquid             |                             |                                      | Biomass, g/L     | Biomass extract    |                     |                              |
|                                       | Tetraene, $\mu\text{g/mL}$ | Candidine, $\mu\text{g/mL}$ | Sum of antibiotics, $\mu\text{g/mL}$ |                  | Tetraene, mg/g ADB | Candidine, mg/g ADB | Sum of antibiotics, mg/g ADB |
| 0                                     | 67 $\pm$ 1.2               | 41 $\pm$ 1.49               | 108 $\pm$ 2.54                       | 7.15 $\pm$ 0.25  | 6.5 $\pm$ 0.29     | 2.71 $\pm$ 0.11     | 9.21 $\pm$ 0.4               |
| 0.1                                   | 73 $\pm$ 1.13              | 44 $\pm$ 1.15               | 117 $\pm$ 0.8                        | 7.34 $\pm$ 0.34  | 8.3 $\pm$ 0.53     | 3.8 $\pm$ 0.15      | 12.1 $\pm$ 0.66              |
| 0.25                                  | 83 $\pm$ 0.57              | 43 $\pm$ 1.49               | 126 $\pm$ 0.96                       | 8.58 $\pm$ 0.4   | 9.3 $\pm$ 0.38     | 4 $\pm$ 0.26        | 13.3 $\pm$ 0.63              |
| 2.5                                   | 87 $\pm$ 1.7               | 30 $\pm$ 1.41               | 120 $\pm$ 2.89                       | 9.54 $\pm$ 0.32  | 4.8 $\pm$ 0.16     | 2.87 $\pm$ 0.12     | 7.67 $\pm$ 0.27              |
| 5                                     | 90 $\pm$ 1.76              | 31 $\pm$ 1.28               | 121 $\pm$ 2                          | 10.16 $\pm$ 0.25 | 10 $\pm$ 0.41      | 7.7 $\pm$ 0.11      | 17.7 $\pm$ 0.45              |
| 10                                    | 106 $\pm$ 1.18             | 39 $\pm$ 1.08               | 145 $\pm$ 1.93                       | 10.1 $\pm$ 0.3   | 12.4 $\pm$ 0.5     | 8.4 $\pm$ 0.33      | 20.8 $\pm$ 0.26              |

**Table S2.** Biosynthesis of squalene and sterols in *S. netropsis* IMV Ac-5025 biomass grown in synthetic nutrient medium supplemented with exogenous  $\beta$ -sitosterol.

| $\beta$ -Sitosterol,<br>$\mu\text{g/mL}$ | Compounds, mg/g of absolutely dry biomass |                    |                    |                    |                     |                     |                           |
|------------------------------------------|-------------------------------------------|--------------------|--------------------|--------------------|---------------------|---------------------|---------------------------|
|                                          | Squalene                                  | Ergosterol         | Cholesterol        | Stigmasterol       | $\beta$ -sitosterol | 24-Epi-brassinolide | Total squalen and sterols |
| 0                                        | 0.10<br>$\pm 0.01$                        | 0.05<br>$\pm 0.01$ | 0.03 $\pm$<br>0.01 | 0.91<br>$\pm 0.32$ | 0.51<br>$\pm 0.24$  | 0.15<br>$\pm 0.01$  | 1.65<br>$\pm 0.43$        |
| 0.1                                      | 0.32<br>$\pm 0.18$                        | 0.08<br>$\pm 0.01$ | 0.05<br>$\pm 0.01$ | 1.82<br>$\pm 0.45$ | 0.71<br>$\pm 0.28$  | 0.21<br>$\pm 0.01$  | 3.18<br>$\pm 0.59$        |
| 0.25                                     | 0.22<br>$\pm 0.15$                        | 0.05<br>$\pm 0.01$ | 0.11<br>$\pm 0.01$ | 2.73<br>$\pm 0.55$ | 1.12<br>$\pm 0.235$ | 0.52<br>$\pm 0.24$  | 4.75<br>$\pm 0.72$        |
| 2.5                                      | 0.13<br>$\pm 0.12$                        | 0.08<br>$\pm 0.01$ | 0.08<br>$\pm 0.01$ | 2.25<br>$\pm 0.5$  | 0.83<br>$\pm 0.30$  | 0.56<br>$\pm 0.25$  | 3.92<br>$\pm 0.66$        |
| 5                                        | 0.24<br>$\pm 0.16$                        | 0.12<br>$\pm 0.01$ | 0.13<br>$\pm 0.02$ | 2.42<br>$\pm 0.52$ | 0.63<br>$\pm 0.26$  | 0.36<br>$\pm 0.20$  | 3.90<br>$\pm 0.66$        |
| 10                                       | 0.55<br>$\pm 0.24$                        | 0.36<br>$\pm 0.20$ | 0.23<br>$\pm 0.16$ | 0.74<br>$\pm 0.29$ | 0.96<br>$\pm 0.32$  | 0.26<br>$\pm 0.01$  | 3.10<br>$\pm 0.59$        |

**Table S3.** Biosynthesis of auxins in *S. netropsis* IMV Ac-5025 biomass grown in synthetic nutrient medium supplemented with exogenous  $\beta$ -sitosterol.

| $\beta$ -Sitosterol,<br>$\mu\text{g/mL}$ | Auxins, $\mu\text{g/g}$ of absolutely dry biomass |                                |                       |                    |                         |                          |                    |
|------------------------------------------|---------------------------------------------------|--------------------------------|-----------------------|--------------------|-------------------------|--------------------------|--------------------|
|                                          | Indole-3-acetic acid                              | Indole-3-acetic acid hydrazide | Indole-3-butiric acid | Indole-3-carbinol  | Indole-3-carboxaldehyde | Indole-3-carboxylic acid | Sum of auxins      |
| 0                                        | 2.320 $\pm$ 0.51                                  | 3.168 $\pm$ 0.59               | 16.336 $\pm$ 1.34     | 14.100 $\pm$ 1.25  | 4.320 $\pm$ 0.69        | 34.000 $\pm$ 1.94        | 74.244 $\pm$ 2.83  |
| 0.1                                      | 18.860 $\pm$ 1.45                                 | 2.208 $\pm$ 0.50               | 86.480 $\pm$ 3.10     | 26.220 $\pm$ 1.71  | 12.000 $\pm$ 1.15       | 61.140 $\pm$ 2.61        | 206.908 $\pm$ 4.79 |
| 0.25                                     | 15.700 $\pm$ 1.32                                 | 2.001 $\pm$ 0.47               | 158.009 $\pm$ 4.19    | 64.000 $\pm$ 2.67  | 14.000 $\pm$ 1.25       | 38.000 $\pm$ 2.05        | 291.710 $\pm$ 5.69 |
| 2.5                                      | 8.750 $\pm$ 0.99                                  | 4.500 $\pm$ 0.7                | 42.000 $\pm$ 2.16     | 165.000 $\pm$ 4.28 | 24.000 $\pm$ 1.63       | 77.500 $\pm$ 2.93        | 321.750 $\pm$ 5.98 |
| 5                                        | 8.120 $\pm$ 0.95                                  | 13.668 $\pm$ 1.23              | 92.280 $\pm$ 3.20     | 212.013 $\pm$ 4.85 | 28.600 $\pm$ 1.78       | 100.120 $\pm$ 3.34       | 454.801 $\pm$ 7.11 |
| 10                                       | 5.841 $\pm$ 1.95                                  | 3.000 $\pm$ 0.58               | 99.120 $\pm$ 3.32     | 70.001 $\pm$ 2.79  | 64.310 $\pm$ 2.67       | 117.999 $\pm$ 3.62       | 360.271 $\pm$ 6.33 |

**Table S4.** Cytokinins' biosynthesis in *S. netropsis* IMV Ac-5025 biomass grown in synthetic nutrient medium supplemented with exogenous  $\beta$ -sitosterol.

| $\beta$ -Sitosterol, $\mu\text{g/mL}$ | Cytokinins, $\mu\text{g/g}$ of absolutely dry biomass |                    |                     |                      |                      |
|---------------------------------------|-------------------------------------------------------|--------------------|---------------------|----------------------|----------------------|
|                                       | Zeatin                                                | Zeatin-riboside    | Isopentyladenine    | Isopentenyladenosine | Cytokinins' sum      |
| 0                                     | 48.093 $\pm$ 0.58                                     | 61.612 $\pm$ 2.45  | 86.121 $\pm$ 2.26   | 58.007 $\pm$ 2.21    | 253.833 $\pm$ 4.51   |
| 0.1                                   | 237.016 $\pm$ 2.38                                    | 187.044 $\pm$ 2.4  | 375.211 $\pm$ 16.58 | 303.783 $\pm$ 4.28   | 1103.054 $\pm$ 19.94 |
| 0.25                                  | 277.126 $\pm$ 0.54                                    | 213.211 $\pm$ 4.37 | 410.222 $\pm$ 7.85  | 372.393 $\pm$ 0.99   | 1272.952 $\pm$ 14.22 |
| 2.5                                   | 67.215 $\pm$ 0.34                                     | 63.211 $\pm$ 0.96  | 535.041 $\pm$ 4.65  | 489.522 $\pm$ 0.66   | 1154.989 $\pm$ 4.06  |
| 5                                     | 251.412 $\pm$ 0.32                                    | 130.523 $\pm$ 0.85 | 702.018 $\pm$ 9.77  | 451.899 $\pm$ 1.66   | 1535.852 $\pm$ 13.47 |
| 10                                    | 660.336 $\pm$ 1.08                                    | 396.225 $\pm$ 6.39 | 980.135 $\pm$ 21.26 | 660.319 $\pm$ 16.72  | 2697.015 $\pm$ 38.6  |
